# Supplementary material for: DALIA- a comprehensive resource of Disease Alleles in Arab population
Source: PLoS One. 2021 Jan 13;16(1):e0244567. doi: 10.1371/journal.pone.0244567 (PMC7806169; doi:10.1371/journal.pone.0244567)
Supplement: S1 Table — (XLSX) [file pone.0244567.s011.xlsx]

## Sheet: Sheet1
	S1 Table The table provides details of the ten genes in our database that had top 1% |iHS| scores, indicating positive selection
	NM_ID	NC_ID	Gene	rsID	Chr	Start	Ref	Alt	Top 1% iHS	Absolute Top 1% iHS
	NM_000053.3:c.1366G>C	NC_000013.10:g.52544805C>G	ATP7B	rs1801244	chr13	52544805	C	G	-4.41599	4.41599
	NM_018676.3:c.670C>T	NC_000013.10:g.52971718G>A	THSD1	rs9536062	chr13	52971718	G	A	-8.18337	8.18337
	NM_000243.2:c.442G>C	NC_000016.9:g.3304626C>G	MEFV	rs3743930	chr16	3304626	C	G	-3.08138	3.08138
	NM_000350.2:c.6764G>T	NC_000001.10:g.94461717C>A	ABCA4	rs6666652	chr1	94461717	C	A	5.83392	5.83392
	NM_000022.2:c.239A>G	NC_000020.10:g.43255220T>C	ADA	rs11555566	chr20	43255220	T	C	-7.68569	7.68569
	NM_144492.2:c.63G>A	NC_000021.8:g.37833931C>T	CLDN14	rs117560775	chr21	37833931	C	T	-3.79659	3.79659
	NM_015166.3:c.597A>G	NC_000022.10:g.50515270T>C	MLC1	rs6010164	chr22	50515270	T	C	-6.65056	6.65056
	NM_015166.3:c.594C>T	NC_000022.10:g.50515273G>A	MLC1	rs6010165	chr22	50515273	G	A	6.33629	6.33629
	NM_015166.3:c.512G>T	NC_000022.10:g.50515843C>A	MLC1	rs6010260	chr22	50515843	C	A	-6.12588	6.12588
	NM_000414.3:c.1531T>C	NC_000005.9:g.118860938T>C	HSD17B4	rs11539471	chr5	118860938	T	C	-6.86112	6.86112
	NM_000015.2:c.590G>A	NC_000008.10:g.18258103G>A	NAT2	rs1799930	chr8	18258103	G	A	-3.07521	3.07521
	NM_005502.3:c.656G>A	NC_000009.11:g.107620867C>T	ABCA1	rs2230806	chr9	107620867	C	T	-3.17595	3.17595
